# Supplementary material for: Petrogenesis, Redox State, and Mineralization Potential of Triassic Granitoids in the Mengshan District, South China
Source: Frontiers journal article supplement (doi:10.3389/feart.2021.657618), 2021-05-11
Supplement: Table_1.XLSX [file Table_1.XLSX]

## Sheet: Sheet1
Supplementary Table 1 Zircon U-Pb ages of granitoids analyzed in this study
Spot	U (ppm)	Th (ppm)	Th/U ratio	207Pb/235U	±2σ	206Pb/238U	±2σ	rho	207Pb/235U Age (Ma)	±2σ	206Pb/238U Age (Ma)	±2σ
Medium-grained porphyritic biotite granite
MS19-05-1	776	608	0.783505	0.2514	0.013	0.03544	0.00073	0.39228	226.8	10	224.4	4.5
MS19-05-2	1501	1084	0.722185	0.2458	0.012	0.0353	0.00066	0.44512	222.6	9.6	223.6	4.1
MS19-05-3	494	418.1	0.846356	0.292	0.016	0.03534	0.00086	0.31987	259	12	223.8	5.3
MS19-05-4	1232	976	0.792208	0.3631	0.017	0.03609	0.0008	0.47967	313.6	13	228.5	5
MS19-05-5	1411	797	0.564848	0.2572	0.011	0.03548	0.00075	0.4177	231.8	8.5	224.7	4.6
MS19-05-6	113.6	74.8	0.658451	0.26	0.019	0.03595	0.00079	0.055369	231	16	227.6	4.9
MS19-05-7	1032	675	0.65407	0.2684	0.0097	0.03554	0.00065	0.10022	240.9	7.7	225.1	4
MS19-05-8	236	98.9	0.419068	0.237	0.015	0.03626	0.00077	0.026036	214	12	229.6	4.8
MS19-05-9	1779	1062	0.596965	0.2574	0.012	0.03562	0.00098	0.36546	232.1	9.9	225.6	6.1
MS19-05-10	1379	504	0.365482	0.2944	0.013	0.03619	0.00088	0.3926	261.4	9.9	229.1	5.5
MS19-05-11	738	506.4	0.686179	0.252	0.015	0.03564	0.00084	-0.16537	227	12	225.7	5.2
MS19-05-12	512	299.8	0.585547	0.246	0.014	0.03627	0.00087	0.36963	221.9	12	229.6	5.4
MS19-05-13	544.6	527	0.967683	0.2484	0.013	0.03571	0.00075	0.27771	224.3	11	226.1	4.7
MS19-05-14	854	482	0.564403	0.2587	0.011	0.0358	0.00062	0.19077	233	8.5	226.7	3.9
MS19-05-15	649	467	0.719569	0.2362	0.009	0.03544	0.00068	0.10397	214.8	7.4	224.5	4.2
MS19-05-16	480	306	0.6375	0.242	0.012	0.03576	0.00071	-0.018602	218.7	9.7	226.4	4.4
MS19-05-17	1126	816	0.724689	0.2662	0.0064	0.03539	0.00042	0.16509	239.3	5.1	224.2	2.6
MS19-05-18	1496	1198	0.800802	1.033	0.036	0.1169	0.0025	0.58223	719	18	712	15
Fine-grained porphyritic biotite granite
SSZK01-123-01	1485	1289	0.868013	0.2535	0.0094	0.03588	0.00053	0.35939	229.5	7.8	227.2	3.3
SSZK01-123-02	897	389	0.433668	0.246	0.01	0.03585	0.00065	0.40956	223.4	8.2	227	4
SSZK01-123-03 (dark mantle)	2150	1030	0.47907	0.2496	0.01	0.03556	0.00086	0.50021	225.7	8.2	225.2	5.3
SSZK01-123-04	1168	596	0.510274	0.2472	0.0098	0.03585	0.00059	0.42527	223.7	8	227	3.7
SSZK01-123-05 (dark mantle)	2920	1910	0.65411	0.2606	0.012	0.03597	0.00092	0.57697	234.6	9.8	227.7	5.7
SSZK01-123-06	257	76.1	0.296109	0.252	0.015	0.03561	0.00087	0.26725	226	12	225.5	5.4
SSZK01-123-07 (dark mantle)	1327	310	0.23361	0.242	0.0089	0.03524	0.00063	0.35613	219.6	7.3	223.2	3.9
SSZK01-123-08	1683	1086	0.645276	0.2456	0.0097	0.03558	0.00079	0.58448	222.5	7.9	225.3	4.9
SSZK01-123-09 (dark mantle)	2760	1153	0.417754	0.2819	0.0084	0.03576	0.00082	0.33392	252.4	6.8	226.5	5.1
SSZK01-123-10	1172	662	0.564846	0.248	0.01	0.03577	0.00071	0.47293	224.3	8.3	226.5	4.4
SSZK01-123-11	1191	865	0.72628	0.244	0.01	0.03616	0.00078	0.35494	221	8.5	228.9	4.9
SSZK01-123-12 (dark mantle)	2060	681	0.330583	0.31	0.016	0.0364	0.00096	0.49953	272.7	12	230.4	6
SSZK01-123-13	422	183.8	0.435545	0.2468	0.012	0.03582	0.00068	0.45013	222.8	9.8	226.8	4.2
SSZK01-123-14	553	508	0.918626	0.246	0.014	0.03558	0.00081	0.39101	222.2	11	225.3	5
SSZK01-123-15 (dark mantle)	2251	1365	0.606397	0.2515	0.0077	0.03576	0.00069	0.4783	227.5	6.3	226.5	4.3
SSZK01-123-16	966	447	0.462733	0.2663	0.0094	0.03553	0.00072	0.13721	239.8	7.4	225	4.5
SSZK01-123-17 (dark mantle)	1662	308	0.185319	0.2518	0.0084	0.03613	0.00073	0.36214	227.6	6.8	228.8	4.5
SSZK01-123-18	706	250.3	0.354533	0.2465	0.011	0.03574	0.0008	0.39598	223.6	9.3	226.3	5
