# Supplementary material for: Petrogenesis, Redox State, and Mineralization Potential of Triassic Granitoids in the Mengshan District, South China
Source: Frontiers journal article supplement (doi:10.3389/feart.2021.657618), 2021-05-11
Supplement: Table_2.XLSX [file Table_2.XLSX]

## Sheet: Sheet1
Supplementary Table 2 Trace element composition of zircons from the studied Mengshan granites
Spot	Ti (ppm)	Y (ppm)	Nb (ppm)	Ta (ppm)	La (ppm)	Ce (ppm)	Pr (ppm)	Nd (ppm)	Sm (ppm)	Eu (ppm)	Gd (ppm)	Tb (ppm)	Dy (ppm)	Ho (ppm)	Er (ppm)	Tm (ppm)	Yb (ppm)	Lu (ppm)	Hf (ppm)	Th/U	Yb/Gd	Ti-in-zircon (℃)	Ce4+/Ce3+	CeN/CeN*	EuN/EuN*	(Ce/Ce*)D	logfO2	ΔFMQ	ΔNNO	ΔHM
Medium-grained porphyritic biotite granite
MS19-05-1	5.48	1403	3.95	2.25	0.143	32.1	0.202	2.4	5.17	0.413	26.3	9.55	125.4	47	216	45.8	411	79.3	10860	0.783505	15.6274	737.297	48.592	46.3069	0.108281	49.5235	-13.86	1.88904	1.32248	-3.73959
MS19-05-2	5.92	1838	13	4.52	0.907	52.3	0.546	4.54	6.8	0.31	34.3	12.29	162.1	59.8	293	62.5	532	102.2	10570	0.722185	15.5102	744.483	45.7231	18.2216	0.062056	46.6405	-13.7215	1.85317	1.29077	-3.76771
MS19-05-3	6.39	987	4.95	1.196	0.298	24.71	0.242	2.5	3.85	0.383	20.5	6.87	89	33.8	157	33.8	286	56.9	10760	0.846356	13.9512	751.692	37.2751	22.5601	0.1318	38.2271	-14.1089	1.29325	0.734991	-4.31995
MS19-05-4	10.66	1683	23.1	3.64	4.07	51	2.11	12	10.11	0.393	39.5	13.41	158.7	57.5	270	55.2	510	97.5	10680	0.792208	12.9114	802.747	14.9914	4.26694	0.0601232	15.9639	-14.9784	-0.731884	-1.26173	-6.29368
MS19-05-5	5.08	1683	11.09	6.5	21	93.8	6.86	29.4	10.6	0.422	31.7	10.51	141.4	53.8	273	59.4	539	102.4	11610	0.564848	17.0032	730.344	15.687	1.91609	0.0703807	16.6317	-18.3164	-2.39614	-2.96676	-8.03239
MS19-05-6	15.54	1256	0.99	0.468	0.0059	3.91	0.172	2.75	5.01	0.598	28.9	9.15	113	41.5	202.5	40.2	375	75.2	8600	0.658451	12.9758	843.726	4.11894	30.0934	0.151935	5.1169	-17.4772	-4.08173	-4.58984	-9.60567
MS19-05-7	4.31	1199	6.39	3.65	1.53	41.04	0.697	4.06	3.72	0.281	20.5	7.54	99.9	38.76	197.6	42.26	360.1	75	11210	0.65407	17.5659	715.588	51.4662	9.74383	0.0983743	52.3791	-14.7809	1.51049	0.931156	-4.14227
MS19-05-8	11.78	1328	0.976	0.48	0.0106	4.99	0.124	1.94	4.6	0.431	26.8	9.26	116.4	42.56	202.4	40.9	359.1	72.5	11130	0.419068	13.3993	813.313	7.9107	33.7459	0.118674	8.90688	-16.6999	-2.67895	-3.2031	-8.23071
MS19-05-9	5.05	1847	13.56	7.1	0.415	45.2	0.458	3.9	6.2	0.29	31.6	11.23	161.8	60.5	307	69.1	633	121.6	11440	0.596965	20.0316	729.805	53.9601	25.4195	0.0633406	54.8787	-13.8593	2.07433	1.5034	-3.56251
MS19-05-10	11.34	3280	5.09	2.4	2.05	25.5	1.52	9.49	9.1	0.52	43.8	17.1	243	92.1	470	107.2	936	181.9	12600	0.365482	21.3699	809.263	13.7053	3.54182	0.0796286	14.6899	-14.9996	-0.892629	-1.41896	-6.44822
MS19-05-11	4.71	1036	5.36	2.58	0.522	36	0.288	2.07	3.2	0.177	17	5.99	89.9	32.6	170.4	36.1	330	67.7	12210	0.686179	19.4118	723.501	82.8751	22.7644	0.0733664	83.7419	-12.5999	3.49105	2.91641	-2.15279
MS19-05-12	5.67	776	3.44	5.7	-	24.9	0.059	0.97	2.15	0.234	13.39	5.13	66.4	25.8	123.3	27.4	247	49.5	10910	0.585547	18.4466	740.456	111.535	-	0.133331	112.368	-10.6213	5.05078	4.48606	-0.574424
MS19-05-13	6.48	1058	3.49	1.76	0.059	34.1	0.15	2.01	4.61	0.301	21.7	7.82	96.5	35.9	174	35.8	317	60.5	10980	0.967683	14.6083	753.022	57.2105	88.8725	0.0920047	58.1197	-12.469	2.90154	2.34404	-2.71026
MS19-05-14	4.52	979	5.53	3.24	0.097	28.8	0.133	1.38	2.64	0.178	15.41	5.9	80.5	31.8	162	35.4	327	65.7	11520	0.564403	21.22	719.814	101.745	62.1678	0.0853179	102.607	-12.0307	4.1533	3.57648	-1.49467
MS19-05-15	5.3	848	3.08	1.72	-	28	0.069	1.03	2.32	0.143	15.5	5.4	68.5	27.9	134.3	29.3	265	53.4	11080	0.719569	17.0968	734.222	116.114	-	0.0729037	116.956	-10.7889	5.03557	4.46722	-0.59642
MS19-05-16	5.58	691	2.94	1.7	0.048	23.6	0.061	0.6	1.69	0.121	11.68	4.42	54.9	21.78	108.8	23.9	214	42.4	10970	0.6375	18.3219	738.971	166.778	106.933	0.0832615	167.545	-9.19594	6.5123	5.94671	0.885481
MS19-05-17	9.39	1236	13.22	4.67	0.82	28.4	0.577	4.79	5.23	0.172	22.8	8.83	110.7	40.2	204.3	41.9	374	77.6	11560	0.724689	16.4035	789.623	24.8859	10.123	0.0481542	25.8595	-13.7639	0.76906	0.232058	-4.80548
Fine-grained porphyritic biotite granite
SSZK01-123-01	4.44	1691	9.37	4.76	2.1	51.3	1.66	9.77	8.49	0.52	33.6	11.15	137.8	52.5	260.9	54.1	474	93	11490	0.868013	14.1071	718.223	14.8644	6.73656	0.0941247	15.8316	-19.136	-2.91172	-3.48948	-8.56149
SSZK01-123-02	4.95	2720	2.44	1.24	0.033	13.94	0.373	5.65	11.6	0.579	61.8	20.98	248.4	83.8	362	70.5	599	106.4	12000	0.433668	9.69256	727.988	3.88816	30.806	0.0661118	4.88428	-23.0417	-7.06299	-7.63499	-12.7018
SSZK01-123-03 (dark mantle)	4.48	1753	15.5	8.27	0.94	37.6	0.48	3.62	4.81	0.163	26.2	10.49	148.7	56.1	284	62.4	614	106.6	12130	0.47907	23.4351	719.022	39.4651	13.7242	0.0443903	40.3967	-15.5745	0.629502	0.0522127	-5.01937
SSZK01-123-04	3.74	1279	7.96	4.78	0.00029	31.4	0.071	1.18	3.48	0.136	19.5	7.63	103.7	42.1	217.9	48.4	450	86.9	12400	0.510274	23.0769	703.198	89.5113	1696.63	0.0504726	90.348	-13.4011	3.21061	2.62384	-2.4564
SSZK01-123-05 (dark mantle)	3.52	2029	16.4	9.34	3.76	41	1.81	9.6	8.33	0.202	35.3	13.19	170.3	65.8	325	70.3	688	124.8	12820	0.65411	19.4901	697.997	14.4632	3.85332	0.0360135	15.443	-20.3233	-3.57468	-4.16459	-9.24777
SSZK01-123-06	9.29	1445	1.14	0.641	0.0066	2.37	0.088	1.56	4.73	0.247	27.2	10.17	130.3	47.5	228.2	44.7	405	78	11730	0.296109	14.8897	788.53	2.813	24.1112	0.0665741	3.812	-21.007	-6.44982	-6.98743	-12.0254
SSZK01-123-07 (dark mantle)	3.99	1678	8.31	5.91	0.185	8.95	0.124	1.34	3.38	0.166	26.5	10.86	142.9	51.4	254.3	52.6	483	95	13230	0.23361	18.2264	708.811	20.6005	14.4881	0.0536229	21.5867	-18.4746	-2.00897	-2.59235	-7.66947
SSZK01-123-08	5.23	1933	10.7	5.6	0.396	39.6	0.388	3.23	5.93	0.276	31.3	11.81	161.8	63.2	316	67	614	117.2	11820	0.645276	19.6166	733.002	39.9258	24.7694	0.0619346	40.8535	-14.803	1.05146	0.482404	-4.58186
SSZK01-123-09 (dark mantle)	10.4	1916	17.08	10.34	0.64	33	0.329	2.1	4.18	0.214	25.8	10.57	148.2	61	305.6	70.2	636	131.5	12760	0.417754	24.6512	800.167	62.7113	17.6324	0.0629998	63.623	-9.90035	4.40197	3.87073	-1.16231
SSZK01-123-10	3.91	1322	9.27	5.11	3.71	41.3	1.43	7.4	4.86	0.258	21.7	8.01	108.7	44.4	223.9	48.2	463	88.4	11790	0.564846	21.3364	707.047	22.8794	4.39622	0.076806	23.8255	-18.1992	-1.68793	-2.27237	-7.35047
SSZK01-123-11	4.61	1384	8.3	4.45	4.61	53.4	1.76	9.6	5.59	0.225	25.1	9.19	120.1	46.7	227.7	50	450	86.1	11430	0.72628	17.9283	721.576	20.8801	4.59641	0.0580715	21.8226	-17.7532	-1.61381	-2.18959	-7.25981
SSZK01-123-12 (dark mantle)	4.3	1921	12.07	8.48	2.07	30.5	1.26	6.74	5.85	0.234	29.7	11.29	161.2	62.4	309	70.5	643	122.4	13000	0.330583	21.6498	715.382	17.9247	4.63035	0.0542729	18.8956	-18.6223	-2.32564	-2.9051	-7.97863
SSZK01-123-13	4.95	991	2.36	1.503	0.021	10.22	0.056	0.76	2.18	0.304	15.45	5.92	79.2	32.1	165	34.3	335	67	12330	0.435545	21.6828	727.988	46.1125	73.0688	0.160142	47.0663	-14.5304	1.44833	0.87633	-4.19052
SSZK01-123-14	6.26	1454	2.62	1.41	0.081	28.2	0.223	3.04	5.73	0.5	31.7	10.57	132.9	49.7	235	48.5	418	80	10290	0.918626	13.1861	749.742	23.2581	51.4445	0.113419	24.2127	-15.9214	-0.472808	-1.03218	-6.08807
SSZK01-123-15 (dark mantle)	6.62	1678	12	7.31	0.115	38.9	0.196	2.18	4.2	0.198	26.3	10.52	142.5	55	277.7	60.1	548	108.4	12340	0.606397	20.8365	755.063	63.3056	63.5268	0.0575952	64.2062	-11.9942	3.32814	2.77181	-2.28151
SSZK01-123-16	3.91	1035	7.59	4.33	0.512	20.97	0.257	1.93	2.49	0.211	14.68	5.4	77.3	31.3	166.3	36.6	337	69.7	12340	0.462733	22.9564	707.047	45.572	14.1736	0.106695	46.5088	-15.6863	0.824984	0.240541	-4.83755
SSZK01-123-17 (dark mantle)	5.36	2314	5.81	4.55	0.062	8.65	0.147	1.79	5.04	0.385	33.8	13.43	186.3	73.4	381.6	82.8	775	156.1	12990	0.185319	22.929	735.256	16.4404	22.215	0.0901801	17.4296	-17.8875	-2.08848	-2.65623	-7.71934
SSZK01-123-18	5.53	1136	4.22	2.99	0.167	12.32	0.148	1.65	3.29	0.236	19.6	7.38	98.9	37.6	187.4	41.4	385	72.6	12200	0.354533	19.6429	738.137	24.0282	19.2135	0.0898483	25.0027	-16.3849	-0.65636	-1.22243	-6.28408
