# Supplementary material for: Petrogenesis, Redox State, and Mineralization Potential of Triassic Granitoids in the Mengshan District, South China
Source: Frontiers journal article supplement (doi:10.3389/feart.2021.657618), 2021-05-11
Supplement: Table_3.XLSX [file Table_3.XLSX]

## Sheet: Sheet1
Supplementary Table 3 Major and trace element compositions of the studied Mengshan granites
Sample No.	MS19-01	MS19-02	MS19-03	MS19-04	MS19-05		MS19-12	MS19-13	MS19-14	MS19-15	MS19-16	MS19-17	SSZK01-123		J03-8-1*	M08-1*	M09-1*	M05-2*	M12-1*
Rock type	Middle-grained porphyritic biotite granite						Fine-grained porphyritic biotite granite								First stage granites
Major elements (wt %)
SiO2	72.856	73.544	74.251	73.189	71.345		76.897	76.179	77.5	76.298	77.786	78.167	75.025		75.46	72.66	75.15	73.67	74.01
TiO2	0.239	0.243	0.323	0.307	0.397		0.148	0.178	0.078	0.154	0.113	0.151	0.241		0.23	0.24	0.21	0.24	0.16
Al2O3	13.689	13.474	12.445	13.016	13.983		12.022	12.252	12.046	12.235	11.799	11.17	12.076		12.8	13.07	12.08	12.81	13.04
TFe2O3	1.747	1.806	2.01	2.092	2.627		1.281	1.46	0.838	1.493	1.236	1.441	1.853		1.6283	1.98627	1.76819	1.74392	1.5592
FeO	1.2	1.13	1.64	1.53	1.74		0.92	0.54	0.4	1.02	0.81	1.17	1.28		1.32	1.48	1.23	1.37	1.15
Fe2O3	0.412184	0.549048	0.185751	0.390109	0.691516		0.257641	0.859333	0.393061	0.358406	0.334999	0.139554	0.429196		0.16	0.34	0.4	0.22	0.28
MnO	0.034	0.025	0.029	0.037	0.039		0.024	0.02	0.015	0.027	0.029	0.038	0.052		0.05	0.05	0.05	0.03	0.04
MgO	0.54	0.489	0.527	0.533	0.624		0.214	0.272	0.127	0.268	0.257	0.227	0.433		0.32	0.44	0.36	0.57	0.3
CaO	1.582	1.496	1.1	1.39	1.325		0.625	0.427	0.339	0.658	0.601	0.426	0.956		0.83	1.4	0.85	1.57	0.79
Na2O	3.096	3.048	2.85	2.834	3.136		3.082	2.668	2.83	3.109	2.877	2.892	2.975		3.11	3.12	3.34	3.11	3.69
K2O	4.408	4.578	5.088	4.905	5.06		4.894	5.412	5.298	5.02	4.24	4.308	4.638		4.57	5.16	5.12	4.88	5.17
P2O5	0.072	0.078	0.103	0.079	0.15		0.028	0.041	0.017	0.032	0.024	0.039	0.072		0.06	0.07	0.05	0.07	0.04
LOI	0.987	0.756	0.738	1.551	0.813		0.539	0.836	0.503	0.462	1.053	0.675	1.091		0.95	1.75	0.97	1.25	1.13
Total	99.25	99.537	99.464	99.933	99.499		99.754	99.745	99.591	99.756	100.015	99.534	99.412		99.86	99.78	99.81	99.79	99.8
Trace elements (ppm)
Li	75.7799	69.974	87.1948	104.261	81.7474		51.2851	43.7354	24.0369	55.8061	46.278	55.8559	53.2081		-	-	-	-	-
Be	3.26656	4.60116	6.59354	6.26061	5.04281		7.07944	7.96954	7.61518	9.58485	10.7438	9.7606	7.18334		-	-	-	-	-
Sc	4.00417	4.36089	5.14237	5.5513	5.52495		3.72311	4.11297	3.03374	4.12596	4.67862	5.27636	5.11413		-	-	-	-	-
V	18.6063	18.9527	21.3398	24.4482	27.1323		7.97035	9.85295	3.96967	8.28791	5.63014	7.42507	17.6597		11.1	14.4	9.2	18.3	7.4
Cr	8.28955	9.06112	6.62557	8.36726	49.1028		38.8275	82.8889	303.023	15.6458	10.9437	11.963	5.43772		5.4	5.3	5	7.2	5.5
Co	3.0404	2.71454	2.90253	2.7883	3.27261		0.991763	1.15833	0.800472	1.43387	0.925052	1.50597	2.54063		1.6	3	1.8	2.9	1.7
Ni	20.2075	3.67737	3.84806	4.02037	2.97571		1.52023	4.00709	7.60564	1.78094	1.31866	1.64749	3.22574		2.83	2.14	2.41	3.26	2.45
Cu	12.6538	12.8925	88.5784	6.02332	60.3665		27.0634	25.6858	40.5421	62.9277	2.48262	1.76496	7.11597		3.2	15	2.7	12	2.7
Zn	29.373	19.3059	27.5282	30.059	33.6062		14.1444	17.8317	15.8178	14.7896	22.2419	23.5065	29.9675		21.8	32.5	30.8	20.8	26.8
Ga	15.1781	16.3899	16.6536	18.5145	18.6315		15.8797	16.362	16.5015	16.9117	16.9493	16.7144	15.638		17.6	17.3	16.9	15.8	18.3
Rb	314.337	318.625	371.285	405.02	334.864		508.093	588.983	541.733	536.365	390.162	499.489	394.148		458	498	429	442	546
Sr	145.919	129.817	106.742	191.225	157.164		25.9006	37.0284	42.5924	34.0245	74.9934	39.3171	92.3309		59	100	42.2	107	52
Y	17.213	27.9853	42.3263	42.615	52.6939		49.7262	31.6312	39.8126	57.4497	63.3121	59.8536	57.2676		58.9	37.5	69.7	40.4	66.2
Zr	143.514	165.837	224.31	174.198	223.497		105.008	144.992	75.7762	140.19	130.081	140.411	170.647		183	176	185	146	134
Nb	12.1648	15.8457	20.2559	18.1576	16.6626		24.9827	26.95	32.3985	27.2039	24.887	21.0552	23.1391		18.9	20	22.4	20.6	25.8
Sn	7.47463	9.27679	13.6053	4.3694	8.01139		3.8329	7.20458	6.27529	6.24604	3.21264	7.15889	3.65605		-	-	-	-	-
Cs	33.504	27.0685	26.7587	43.5111	24.2008		20.6869	19.2059	16.1902	23.0804	21.2554	37.2509	27.6065		41.4	30.6	23.6	39.7	28
Ba	524.072	394.971	266.848	282.501	585.205		36.7737	109.666	27.7401	63.5994	37.0658	59.9294	135.322		227	326	115	309	71
La	33.0889	40.7796	50.5911	49.547	66.713		28.8452	28.2395	10.4908	34.4917	32.2116	66.813	42.2926		49.2	48.9	63.3	32.6	39
Ce	64.2195	76.5005	97.5539	103.598	107.761		62.4453	60.638	29.0253	75.2954	72.6383	113.431	88.5786		94.7	101	134	74.2	89.9
Pr	6.58177	8.76727	11.0484	11.6123	16.0281		6.94617	7.29107	3.22955	8.83096	8.68369	16.2602	10.1968		10.5	10	14.3	7.86	9.71
Nd	23.0004	28.8552	36.3989	39.0336	59.7201		24.3361	25.5185	12.1795	28.7075	28.8508	58.4119	33.4648		34.6	33.4	47.3	27.1	33.7
Sm	4.35781	5.40981	6.76594	7.80883	11.3272		5.32602	5.98342	3.49689	6.51029	7.08793	12.04	6.98922		7.44	6.48	10.2	5.88	8.07
Eu	0.61302	0.612797	0.599051	0.534374	1.50123		0.194246	0.263606	0.12151	0.206403	0.116138	0.259143	0.33895		0.42	0.55	0.32	0.43	0.19
Gd	3.32713	4.40701	6.00641	6.10574	10.7217		5.40698	5.02961	3.57968	6.1606	7.31593	10.2753	6.52877		7.43	5.39	8.75	5.08	7.4
Tb	0.527169	0.707593	0.994239	1.05342	1.76346		1.03135	0.971523	0.795578	1.17599	1.37246	1.70046	1.2257		1.3	0.92	1.57	0.92	1.43
Dy	2.84665	4.13332	6.22237	6.60261	9.50964		6.87807	6.21743	5.64656	7.79864	9.15231	9.52999	8.28101		8.78	6.27	11	6.44	9.76
Ho	0.537081	0.873306	1.32718	1.34445	1.83827		1.56104	1.23952	1.25584	1.70191	2.05796	1.87357	1.76434		1.91	1.25	2.35	1.4	2.19
Er	1.62161	2.54148	4.05459	4.09585	4.9583		4.84157	3.89332	4.16653	5.53155	6.25771	5.27244	5.59619		5.94	3.88	7.37	4.28	6.62
Tm	0.227545	0.370813	0.629288	0.610438	0.650253		0.774993	0.627595	0.69551	0.893803	0.956254	0.824009	0.895195		0.96	0.62	1.17	0.67	1.11
Yb	1.65254	2.63953	4.3825	4.23213	4.57736		5.83324	4.89841	5.32022	6.7136	7.02889	5.98202	6.32394		6.33	4.42	8.18	5.07	8.11
Lu	0.245342	0.399013	0.665613	0.641851	0.644715		0.900359	0.714284	0.775483	1.00516	1.08954	0.891336	0.960143		0.92	0.67	1.24	0.76	1.19
Hf	4.04783	4.66757	6.20534	5.16146	5.92638		4.00882	5.38221	3.56458	5.39573	4.87617	4.77656	5.40361		5.72	5.56	6.2	5	5.64
Ta	1.73216	2.20057	3.10111	2.56747	1.6746		4.51543	4.6993	5.64608	5.32891	4.25719	3.91037	3.27596		9.36	4.08	3.75	3.8	5.75
W	4.33467	3.49988	6.78393	6.10815	1.39441		2.64767	3.26082	3.65623	2.37038	7.94281	10.5991	2.56464		-	-	-	-	-
Tl	2.59083	2.56584	2.91773	2.31948	2.35217		2.4733	3.12333	2.38535	2.45642	2.22696	2.42926	1.55773		-	-	-	-	-
Pb	59.3393	49.2501	53.3626	55.7933	50.1709		56.9028	59.0633	50.0397	56.5979	45.5756	59.0525	54.5756		42.9	60.5	2	61.4	59.4
Th	26.7291	31.2544	42.2176	43.0725	28.6405		49.9107	58.0468	31.2054	52.6279	53.812	57.0278	47.1978		43.4	42.6	66.3	39.6	48.8
U	5.12654	5.73829	14.9918	15.5431	9.51522		24.5871	20.5719	13.536	24.214	19.5529	17.0659	23.4186		16.22	12.4	10.2	23.5	17.3
Na2O+K2O	7.63665	7.72011	8.04044	7.86628	8.30513		8.03911	8.16913	8.20281	8.1868	7.19165	7.2831	7.74301		7.76463	8.44639	8.55929	8.10838	8.97943
K2O/Na2O	1.42377	1.50197	1.78526	1.73077	1.61352		1.58793	2.02849	1.87208	1.61467	1.47376	1.48963	1.55899		1.46945	1.65385	1.53293	1.56913	1.40108
CaO/Na2O	0.702359	0.665793	0.560142	0.577778	0.619763		0.629751	0.492979	0.534164	0.619323	0.678538	0.671309	0.64144		0.266881	0.448718	0.254491	0.504823	0.214092
ANK	1.38601	1.34982	1.21894	1.30358	1.31297		1.15809	1.19393	1.15775	1.15839	1.26409	1.18421	1.21647		1.27042	1.21785	1.09315	1.23034	1.11638
ACNK	1.07297	1.06037	1.01897	1.0399	1.07041		1.04364	1.10982	1.09289	1.04034	1.1314	1.0942	1.03494		1.10467	0.984035	0.958822	0.965233	0.993935
Al2O3/TiO2	57.2762	55.4486	38.5294	42.3974	35.2217		81.2297	68.8315	154.436	79.4481	104.416	73.9735	50.1079		55.6522	54.4583	57.5238	53.375	81.5
Fe2O3T+MgO	2.287	2.295	2.537	2.625	3.251		1.495	1.732	0.965	1.761	1.493	1.668	2.286		1.96977	2.47503	2.15316	2.3482	1.88426
TFeO/MgO	2.90843	3.32023	3.42882	3.52853	3.78473		5.3814	4.82551	5.93198	5.00824	4.3236	5.70687	3.84722		4.5745	4.05832	4.41556	2.75049	4.6724
Fe2O3/FeO	0.343486	0.485883	0.113263	0.254973	0.397423		0.280044	1.59136	0.982653	0.351378	0.413579	0.119277	0.335309		0.121212	0.22973	0.325203	0.160584	0.243478
Mg#	25.5857	23.1469	22.5794	22.0822	20.8998		15.6705	17.1659	14.4259	16.6438	18.7843	14.9101	20.6304		17.9388	19.7694	18.4653	26.6632	17.6292
TZr (℃)	781	794	821	798	821		757	784	731	781	775	774	791		808	790	794	772	768
K/Rb	118.419	120.695	115.179	102.144	127.055		80.5583	77.0878	81.8978	78.2145	91.1211	72.3936	99.3097		82.7975	85.978	99.0329	91.6145	78.5714
Nb/Ta	7.02292	7.20073	6.53182	7.07217	9.95022		5.53275	5.73489	5.73822	5.10497	5.84587	5.38446	7.06329		2.01923	4.90196	5.97333	5.42105	4.48696
Zr/Hf	35.4546	35.5295	36.1479	33.7498	37.7122		26.1942	26.9391	21.2581	25.9817	26.6768	29.3957	31.5801		31.993	31.6547	29.8387	29.2	23.7589
Rb/Sr	2.15419	2.45441	3.47835	2.11803	2.13066		19.617	15.9062	12.719	15.7641	5.20262	12.7041	4.26887		7.76271	4.98	10.1659	4.13084	10.5
Rb/Ba	2.15419	2.45441	3.47835	2.11803	2.13066		19.617	15.9062	12.719	15.7641	5.20262	12.7041	4.26887		2.01762	1.52761	3.73043	1.43042	7.69014
10000Ga/Al	2.05799	2.26966	2.49547	2.64336	2.48376		2.47542	2.49501	2.56394	2.59246	2.68523	2.79422	2.40498		2.56891	2.45096	2.61191	2.29576	2.61556
DyN/YbN	1.15292	1.04807	0.950275	1.04417	1.39048		0.789172	0.849515	0.710346	0.777461	0.871483	1.06625	0.876417		0.928338	0.949425	0.900025	0.850145	0.80546
Note: 5 samples of J03-8-1*, M08-1*, M09-1*, M05-2*, and M12-1* were from Zhong et al. (2011)
