# Supplementary material for: Petrogenesis, Redox State, and Mineralization Potential of Triassic Granitoids in the Mengshan District, South China
Source: Frontiers journal article supplement (doi:10.3389/feart.2021.657618), 2021-05-11
Supplement: Table_4.XLSX [file Table_4.XLSX]

## Sheet: Sheet1
Supplementary Table 4 Zircon Hf isotopes of the studied Mengshan granites
Sample	Age (Ma)	176Yb/177Hf	176Lu/177Hf	2σ	176Hf/177Hf	2σ	176Hf/177Hf (t)	εHf(0)	εHf(t)	2σ	TDM	TDMC	fLu/Hf
Medium-grained porphyritic biotite granite
MS19-05-1	224.4	0.0447889	0.00182685	2.01795e-05	0.282725	1.91867e-05	0.282718	-1.64704	3.01244	0.678858	762.788	1065.88	-0.944974
MS19-05-2	223.6	0.0859893	0.00341432	4.92599e-05	0.282883	2.06394e-05	0.282868	3.91391	8.3245	0.730252	559.431	725.707	-0.897159
MS19-05-3	223.8	0.0743036	0.00277574	1.00973e-05	0.282863	1.84256e-05	0.282851	3.20544	7.71424	0.651926	579.26	764.955	-0.916393
MS19-05-4	228.5	0.0664467	0.00264973	7.89861e-06	0.282852	2.05661e-05	0.28284	2.81649	7.43909	0.72767	593.528	786.187	-0.920189
MS19-05-5	224.7	0.0443874	0.00177227	5.64441e-06	0.282777	2.26632e-05	0.282769	0.163298	4.83804	0.801862	687.807	949.597	-0.946619
MS19-05-6	227.6	0.0671883	0.00248523	3.92851e-06	0.282843	1.52771e-05	0.282832	2.50898	7.13796	0.540531	603.649	804.768	-0.925144
MS19-05-7	225.1	0.0503755	0.00198883	8.30445e-06	0.2827	2.08356e-05	0.282692	-2.53057	2.11891	0.737198	802.374	1123.36	-0.940095
MS19-05-8	229.6	0.0478524	0.00192695	2.90159e-06	0.282805	2.03781e-05	0.282797	1.17033	5.92428	0.721018	649.407	883.945	-0.941959
MS19-05-9	225.6	0.0343494	0.00137946	1.20707e-05	0.282755	2.01274e-05	0.282749	-0.610802	4.14099	0.712143	711.816	994.832	-0.95845
MS19-05-10	229.1	0.0416273	0.0016828	1.4687e-05	0.282743	2.0387e-05	0.282736	-1.02489	3.7546	0.721331	734.508	1022.14	-0.949313
MS19-05-11	225.7	0.0503939	0.00199934	6.08846e-06	0.282765	2.01328e-05	0.282757	-0.244159	4.41731	0.712332	708.803	977.21	-0.939779
MS19-05-12	229.6	0.0786972	0.00303347	2.7257e-05	0.282865	1.95348e-05	0.282852	3.30032	7.88716	0.69118	579.438	758.343	-0.908631
MS19-05-13	226.1	0.064237	0.0024832	1.93941e-05	0.282757	1.6339e-05	0.282746	-0.547904	4.04928	0.578101	730.925	1000.96	-0.925205
MS19-05-14	226.7	0.0599585	0.00239216	4.58244e-06	0.282747	2.15676e-05	0.282737	-0.877035	3.74587	0.7631	742.744	1020.79	-0.927947
MS19-05-15	224.5	0.0479187	0.00192171	2.48173e-06	0.282783	1.49094e-05	0.282775	0.397913	5.04639	0.527519	680.989	936.124	-0.942117
MS19-05-16	226.4	0.0677392	0.00254922	8.38711e-06	0.282846	1.7228e-05	0.282835	2.621	7.21597	0.609556	600.04	798.85	-0.923216
MS19-05-17	224.2	0.0409572	0.00165203	1.26185e-05	0.282731	2.20235e-05	0.282724	-1.44206	3.2393	0.779227	750.854	1051.27	-0.95024
Fine-grained porphyritic biotite granite
SSZK01-123-01	227.2	0.0328695	0.00131158	2.12992e-06	0.282717	1.69269e-05	0.282712	-1.92872	2.86641	0.598906	763.606	1077.39	-0.960495
SSZK01-123-02	227	0.0690979	0.00266535	1.57705e-05	0.282802	1.47927e-05	0.282791	1.07769	5.66665	0.523392	666.621	898.357	-0.919718
SSZK01-123-04	227	0.0753219	0.00288694	3.58407e-06	0.282819	1.74576e-05	0.282806	1.65204	6.20799	0.61768	646.559	863.746	-0.913044
SSZK01-123-06	225.5	0.0796598	0.00313755	1.11708e-05	0.282818	1.70294e-05	0.282805	1.63758	6.12594	0.602528	651.739	867.82	-0.905496
SSZK01-123-08	225.3	0.0461525	0.00176886	6.38272e-06	0.28279	1.51374e-05	0.282783	0.653976	5.34198	0.535588	667.71	917.866	-0.946721
SSZK01-123-10	226.5	0.0647876	0.002542	4.09589e-06	0.28281	1.93113e-05	0.282799	1.33918	5.93663	0.68327	653.432	880.73	-0.923434
SSZK01-123-11	228.9	0.0442815	0.00177676	1.95209e-05	0.282722	1.87791e-05	0.282715	-1.76235	2.99834	0.664442	766.453	1070.23	-0.946483
SSZK01-123-13	226.8	0.0583025	0.0022626	1.65822e-05	0.282855	1.53832e-05	0.282846	2.95103	7.59734	0.544284	581.627	774.772	-0.931849
SSZK01-123-14	225.3	0.0830206	0.00327147	3.16016e-05	0.282891	1.48911e-05	0.282877	4.2177	8.68336	0.526874	544.204	704.046	-0.901462
SSZK01-123-16	225	0.0571814	0.00228109	5.56424e-05	0.282649	2.90409e-05	0.282639	-4.36404	0.238934	1.02751	884.496	1242.96	-0.931292
SSZK01-123-17 (rim)	228.8	0.0402023	0.001592	4.39613e-06	0.282742	2.59917e-05	0.282735	-1.05265	3.7343	0.919637	733.836	1023.22	-0.952048
SSZK01-123-18	226.3	0.0680159	0.00280292	5.10561e-05	0.282851	1.57516e-05	0.282839	2.78473	7.33975	0.55732	597.404	790.841	-0.915575
