# Supplementary material for: Petrogenesis, Redox State, and Mineralization Potential of Triassic Granitoids in the Mengshan District, South China
Source: Frontiers journal article supplement (doi:10.3389/feart.2021.657618), 2021-05-11
Supplement: Table_5.XLSX [file Table_5.XLSX]

## Sheet: Sheet1
Supplementary Table 5 Whole-rock Sm-Nd isotopes of the studied Mengshan granites
Sample	Sm (ppm)	Nd (ppm)	147Sm/144Nd	143Nd/144Nd	2σ	f(Sm/Nd)	εNd(0)	TDM	εNd (t)	TDM2
Zircon U-Pb age = 226 Ma
Middle-grained porphyritic biotite granite
MS19-01	4.36	23	0.114593	0.51227	4	-0.417421	-7.17855	1.3517	-4.81223	1.39162
MS19-02	5.41	28.86	0.11332	0.512305	4	-0.423896	-6.49581	1.28177	-4.09233	1.33321
MS19-03	6.77	36.4	0.112431	0.51224	3	-0.428415	-7.76376	1.36786	-5.33534	1.43405
MS19-04	7.81	39.03	0.12093	0.512128	5	-0.385207	-9.94854	1.67526	-7.76672	1.6311
MS19-05	11.33	59.72	0.114685	0.512241	4	-0.416953	-7.74426	1.39734	-5.38091	1.43775
Average	7.136	37.402	0.115192	0.512237		-0.414378	-7.82619	1.41479	-5.47751	1.44555
Fine-grained porphyritic biotite granite
MS19-12	5.33	24.34	0.132297	0.512244	3	-0.33	-7.69	1.69	-5.83	1.47
MS19-13	5.98	25.52	0.141739	0.512222	4	-0.28	-8.11	1.96	-6.53	1.53
MS19-14	3.5	12.18	0.173561	0.512267	4	-0.12	-7.24	3.33	-6.57	1.53
MS19-15	6.51	28.71	0.137089	0.512252	4	-0.3	-7.53	1.78	-5.81	1.47
MS19-16	7.09	28.85	0.148512	0.512277	4	-0.24	-7.04	2.03	-5.65	1.46
MS19-17	12.04	58.41	0.124601	0.512239	5	-0.37	-7.78	1.56	-5.71	1.46
SSZK01-123	6.99	33.46	0.126251	0.512214	4	-0.36	-8.27	1.63	-6.24	1.51
Average	6.77714	30.21	0.140579	0.512245		-0.285714	-7.66571	1.99714	-6.04857	1.49
J03-8-1*	7.44	34.6	0.1306	0.512193	1	-	-	1.8	-6.7	1.6
M09-1*	10.2	47.3	0.13	0.512224	2	-	-	1.6	-6.1	1.5
Note: 2 samples of J03-8-1* and M09-1* were from Zhong et al. (2011)
