# Supplementary material for: Petrogenesis, Redox State, and Mineralization Potential of Triassic Granitoids in the Mengshan District, South China
Source: Frontiers journal article supplement (doi:10.3389/feart.2021.657618), 2021-05-11
Supplement: Table_6.XLSX [file Table_6.XLSX]

## Sheet: Granite ages
Supplementary Table 6 Zircon U-Pb ages of Triassic peraluminous granites and the mineralization ages of Triassic ore deposits in South China
Granitic plutons	Lithology	Age (Ma)	Deviation
Keshuling	Fine-grained porphyritic two-mica monzonite	223	0
Limu	Medium- to fine-grainedmuscovite granite	217.1	1.4
Limu	Medium- to fine-grainedmuscovite granite	214	5
Limu	Medium- to fine-grainedmuscovite granite	212.3	1.8
Yuntoujie	Muscovite granite	216.8	4.9
Jiepai	Tourmaline granite	219.2	1.5
Qingshan	Midium-grained biotite granite	231.9	1
Gaoling	Monzogranite	221.6	2.4
Sanjiaotan	medium-grained porphyritic biotite monzogranite	223.1	2.6
Sanjiaotan	medium- to fine-grained tourmaline-bearing biotite monzogranite	206.4	0.5
Sanjiaotan	fine-grained two-mica monzogranite	202	1.8
Jiangjunmiao	medium-grained porphyritic biotite monzogranite	229.1	2.8
Wufengxian	Biotite monzogranite	233.5	2.5
Muguayuan	Granite porphyry	224.2	2
Wangxianling	Medium-grained tourmaline muscovite granite	223.5	1.8
Wangxianling	Granite porphyry	222.5	2.9
Wangxianling	Granite porphyry	224.9	1.7
Wangxianling	Granite porphyry	225.6	1.4
Xitian	Biotite granite	227.3	1.8
Dashenshan	Biotite monzogranite	224.3	1
Douzhashan	Fine- to medium-grained two-mica granite	203	4
Xiangcaoping	Medium- to coarse-grained porphyritic biotite granite	211	3
Yangmingshan	Yangmingshan granite	218	10
Yangmingshan	Yangmingshan granite	218	3
Yangmingshan	Yangmingshan granite	215	5
Baimashan	Baimashan granite	204	3
Baimashan	Baimashan granite	224	2
Baimashan	Baimashan granite	221	4
Liyuan	Granite	227	4
Darongshan	Granite	233	5
Jiuzhou	Granite	230	4
Taima	Granite	236	4
Baimashan	Granite	216	2
Weishan	Granite	211	2
Weishan	Weishan granite	216	2
Yueshanwan	Weishan granite	211	2
Maishimian	Granite	241	7
Longyuanba	Biotite granite	240	1
Yangmingshan	Two-mica granite	218	4
Baimashan	Hornblende biotite monozogranite	217	2
Guidong	Monzogranite	238	3
Mengdong	Ganodiorite	231	3
Aigao	Biotite granite	249	6
Sanbiao	Biotite granite	247	3
Wanxi	Huangmaoyuan granite	222	2
Maofeng	Two-mica granite	220	4
Qijiang	Baimashan granite	223	1
Longtan	Baimashan granite	205	2
Luotian	Jintang granite	222	2
Xitian	Xitian granite	229	3
Xiangzikou	Granite	210	5
Xiema	Granite	214	6
Napeng	Granite	245	5
Napeng	Granite	205	2
Wuliting	Granite	238	5
Gedongping	Gedongping granite	211	5
Xiazhuang	Two-mica granite	228	1
Changsha	Muscovite-granite	224	4
Youshan	Granite	213	3
Hepingtian	Granite	239	2
Miaoershan	Yuechengling granite	214	3
Miaoershan	Granite	217	3
Yuchengling	Granite	212	0
Yangfang	Pyroxene syenite	242	4
Yangmingshan	Yangmingshan granite	237	5
Baimashan	Baimashan granite	241	3
Tangshi	Tangshi granite	243	4
Wufengxian	Granite	236	6
Wawutang	Granite	235	4
Guandimiao	Granite	239	3
Xiaotao	Granite	222	3
Gaoaobei	Granite	222	2
Congyangping	Granite	218	5
Nameng	Cordieiite granite	228	9
Dasi	Charnockites	244	5
Nagui	Charnockites	247	3
Wuping	Granite	234	7
Julin	Granite	242	3
Luxi	Biotite granite	239	5
Xiazhuang	Granite	236	7
Taojiang	Taojiang granite	211	3
Dashenshan	Dashenshan granite	218	3
TangPeng	Granite	225	12
TangPeng	Granite	204	0
Fucheng	Monzogranite	239	17
Fucheng	Monzogranite	231	11
Zhuchangdong	Granite	229	7
Wuliting	Granite	239	1
Longyuanba	Granite	211	4
Yuechenling	Granite	211	5
Jiufeng-Zhuguang	Granite	235	5
Jiufeng-Zhuguang	Granite	250	3
Wufengxian	Granite	243	5
Jiufeng-Zhuguang	Granite	234	6
Jiufeng-Zhuguang	Granite	204	3
Jiufeng-Zhuguang	Granite	210	2
Jiufeng-Zhuguang	Granite	208	4
Longyuanba	Granite	241	6
Longyuanba	Granite	235	7
Longyuanba	Granite	211	3

## Sheet: Mineralization ages
Supplementary Table 6 Zircon U-Pb ages of Triassic peraluminous granites and the mineralization ages of Triassic ore deposits in South China
Ore deposits	Associated intrusions	Methods	Age (Ma)	Deviation
Limu	Medium- to fine-grainedmuscovite granite	Mica Ar-Ar	214.1	1.9
Limu	Medium- to fine-grainedmuscovite granite	Mica Ar-Ar	212.4	1.4
Liguifu	Fine-grained porphyritictwo-mica monzonite	Molybdenite Re-Os	211.9	6.4
Xianetang	Medium- to fine-grainedporphyritic two micagranite	Mica Ar-Ar	231.4	2.4
Yuntoujie	Muscovite granite	Molybdenite Re-Os	216.8	7.5
Yuntoujie	Muscovite granite	Molybdenite Re-Os	226.2	4.1
Yuntoujie	Muscovite granite	Molybdenite Re-Os	219.3	4
Zhazixi	Granite	Scheelite Sm-Nd	227.3	6.2
Nanyangtian	Granite porphyry	Molybdenite Re-Os	214.1	4.3
Jiepai	Tourmaline granite	Molybdenite Re-Os	215.5	3.3
Qingshan	Midium-grained biotite granite	Molybdenite Re-Os	228.7	2.5
Qingshan	Midium-grained biotite granite	Mica Ar-Ar	229.4	1.4
Gaoling	Monzogranite	Molybdenite Re-Os	215.3	8.6
Gaoling	Monzogranite	Molybdenite Re-Os	219.3	4
Gaoling	Monzogranite	Molybdenite Re-Os	225.1	5.8
Gaoling	Monzogranite	Molybdenite Re-Os	227.3	3.4
Sanjiaotan	medium-grained porphyritic biotite monzogranite	Molybdenite Re-Os	225.8	4.4
Longshang	Biotite granite	Molybdenite Re-Os	225.5	3.6
Muguayuan	Granite porphyry	Molybdenite Re-Os	225.4	1.4
Wangxianling	Tourmaline muscovite/two-mica granite	Molybdenite Re-Os	220.6	1.1
Wangxianling	Tourmaline muscovite/two-mica granite	Mica Ar-Ar	214.3	1.1
Wangxianling	Tourmaline muscovite/two-mica granite	Molybdenite Re-Os	227.2	1.5
Hehuaping	Fine-grained granite	Molybdenite Re-Os	224	1.9
Darongxi	Biotite monzogranite	Molybdenite Re-Os	219	1.2

## Sheet: References
References:
Cai, M.H., Chen, K.X., Qu, W.J., Liu, G.Q., Fu, J.M. and Qiu, J.P. (2006). Geological charateristics and Re-Os dating of molybdenites in Hehuaping tin-polymetallic deposit, southern Hunan Province. 25 (3), 263–268 (in Chinese with English abstract).
Chen, D., Liu, J.Y., Wang, X.H., Yang, J., Ma, T.Q. and Luo, K. (2020). The petrogeochemistry, SHRIMP zircon U-Pb age, and Hf isotope character of Wufengxian pluton in Hunan Province. Geological Science and Technology Information. 36 (6), 1–12 (in Chinese with English abstract).
Deng, X.W. (2016). Metallogenic model of Hejiangkou Sn-W polymetal deposit related to felsic magmatism, east Hunan. School of Geosciences and Info-Physics Central South University, Hunan, China.
Feng, J.R., Mao, J.W., Pei, R.F. and Li, C. (2011). Ore-forming fluids and metallogenesis of Nanyangtian tungsten deposit in Laojunshan, southeastern Yunnan Province.Mineral Deposits. 30 (3), 403–419 (in Chinese with English abstract).
Li, X.Y., Yi, L.W., Chen, D., Wen, C.H., Tang, F.P., Zhang, X.Y., An, J.H. and Deng, L. (2020). Petrogenesis of the Jiangjunmiao granitic pluton in Hunan Province: constraints from petrogenesis, zircon U-Pb dating, and Sr-Nd-Hf isotopes. Bulletin of Mineralogy and Geochemistry. 39 (4), 726–740 (in Chinese with English abstract).
Liu, S., Wang, D., Chen, Y., Li, J., Ying, L., Xu, J. and Zeng, Z. (2008). 40Ar/39Ar ages ofmuscovite from different types tungsten-bearing quartz veins in the Chong-Yu-You concentrated mineral area in Gannan region and its geological significance. Acta Geologica Sinica. 82 (7), 932–940 (in Chinese with English abstract).
Niu, R., Liu, Q., Hou, Q.L., Sun, J.F., Wu, S.C., Zhang, H.Y., Guo, Q.Q. and Wang, Q. (2015). Zircon U-Pb geochronology of Xitian granitic pluton in Hunan Province and its constraints on the metallogenic ages of the tungsten-tin deposits. Acta Petrologica Sinica. 31 (9), 2620–2632 (in Chinese with English abstract).
Peng, N.L., Wang, X.H., Yang, J., Chen, D., Luo, L., Luo, P. and Liu, T.Y. (2017). Re–Os dating of molybdenite fromm Sanjiaotan tungsten deposit in Chuankou area, Hunan Province, and its geological implications. Mineral Deposits. 36 (6), 1402–1414 (in Chinese with English abstract).
Shan, L., Pang, Y.C., Ke, X.Z., Liu, J.J., Chen, W.H., Niu, Z.J., Xu, D.M., Long, W.G. and Wang, B.Q. (2019). Diagenetic and metallogenic age of the Muguayuan tungsten polymetallic deposit and its effect on regional mineralization, Taojiang County, northeastern Hunan Province, China. Geological Science and Technology Information. 38 (1), 100-112 (in Chinese with English abstract).
Wang, Y.J., Fan, W.M., Zhang, G.W. and Zhang, Y.H. (2013). Phanerozoic tectonics of the South China Block: Key observations and controversies. Gondwana Research. 23, 1273–1305.
Wang, Y.L., Chen, Y., Wang, D., Xu, J. and Chen, Z. (2012). Scheelite Sm-Nd dating of theZhazixi W-Sb deposit in Hunan and its geological significance. Geology of China. 39(5), 1339–1344 (in Chinese with English abstract).
Wu, J., Liang, H.Y., Huang, W.T., Wang, C.L., Sun, W.D., Sun, Y.L., Li, J., Mo, J.H. and Wang, X.Z. 2012. Indosinian isotope ages of plutons and deposits in southwestern Miaoershan-Yuechengling, northeastern Guangxi and implications on Indosinianmineralization in South China. Chinese Science Bulletin. 57 (13), 1126–1136 (in Chinese with English abstract).
Yang, F., Li, X., Feng, Z. and Bai, Y. (2009).40Ar/39Ar dating of muscovite from geisenized granite and geological significance in Limu tin deposit. Journal of Guilin University of Technology.29 (1), 21–24 (in Chinese with English abstract).
Zhao, Z., Zhao, W.W., Lu, L. and Wang, H.Y. (2018). Constraints of multiple dating of the Qingshan tungsten deposit on the Triassic W (-Sn) mineralization in the Nanling region, South China. Ore Geology Reviews. 94, 46–57.
Zhang, L.S., Peng, J.T., Hu, A.X., Lin, F.M. and Zhang, T. (2014). Re-Os dating of molybdenite from Darongxi tungsten deposit in western Hunan and its geological implications. Mineral Deposits. 33 (1), 181–189 (in Chinese with English abstract).
Zhang, L.S., Peng, J.T., Zhang, D.L.and Yang, J.H. (2012). Geochemistry and Petrogenesis of the Indosinian Dashenshan Granite, western Hunan, South China. Geotectonica et Metallogenia 36 (1), 137–150 (in Chinese with English abstract).
Zhang, R.Q., Lu, J.J., Wang, R.C., Yang, P., Zhu, J.C., Yao, Y., Gao, J.F., Li, C., Lei, Z.H., Zhang, W.L. and Guo, W.M. (2015). Constraints of in situ zircon and cassiterite U-Pb, molybdenite Re-Os and muscovite Ar-Ar ages on multiple generations of granitic magmatism and related W-Sn mineralization in the Wangxianling area, Nanling Range, South China. Ore Geology Reviews. 65, 1021–1042.
Zou, X., Cui, S., Qu, W., Bai, Y. and Chen, X. (2009). Re-Os isotope dating of the Liguifutungsten-tin polymetallic deposit in Dupangling area, Guangxi. Geology of China. 36(4), 837–844 (in Chinese with Engligh abstract).
